# Supplementary material for: Research on an Optimized Quarter-Wavelength Resonator-Based Triboelectric Nanogenerator for Efficient Low-Frequency Acoustic Energy Harvesting
Source: MDPI journal article supplement (doi:10.3390/nano13101676), 2023-05-19
Supplement: s1 [file s1]

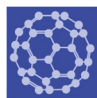

# Research on an Optimized Quarter-Wavelength Resonator-Based Triboelectric Nanogenerator for Efficient Low-Frequency Acoustic Energy Harvesting

Xiu Xiao \*, Ling Liu, Ziyue Xi, Hongyong Yu, Wenxiang Li, Qunyi Wang, Cong Zhao, Yue Huang and Minyi Xu \*

Dalian Key Lab of Marine Micro/Nano Energy and Self-Powered System, Marine Engineering College,  
Dalian Maritime University, Dalian 116026, China

\* Correspondence: xiaoxiu@dlmu.edu.cn (X.X.); xuminyi@dlmu.edu.cn (M.X.)

## Supporting Figures

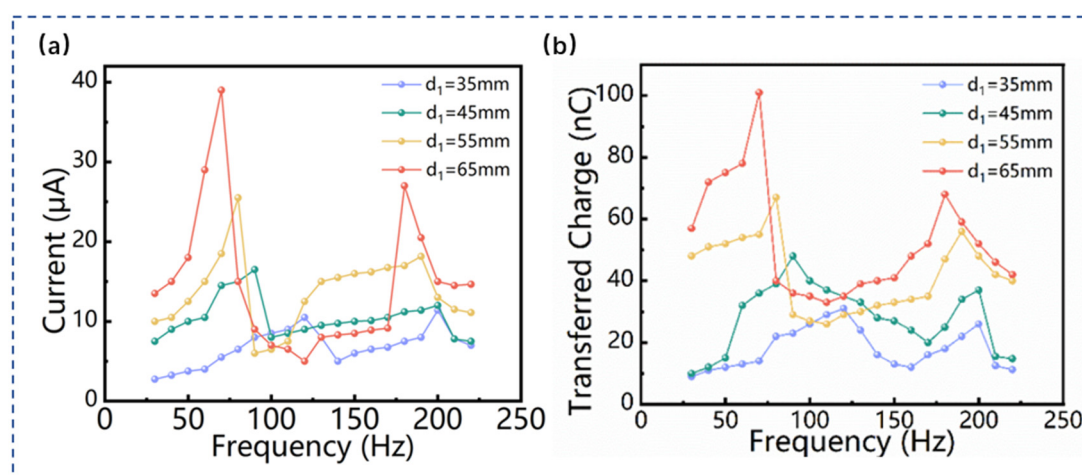

Figure S1. Effect of power generation unit area on (a) short-circuit current and (b) transferred charge of QWR-TENG.

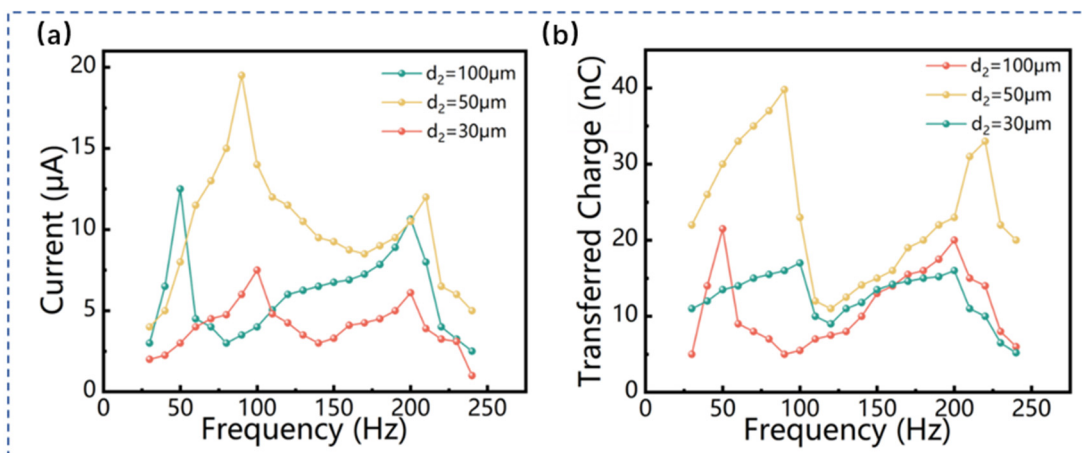

Figure S2. Effect of FEP film thickness on (a) short-circuit current and (b) transferred charge of QWR-TENG.

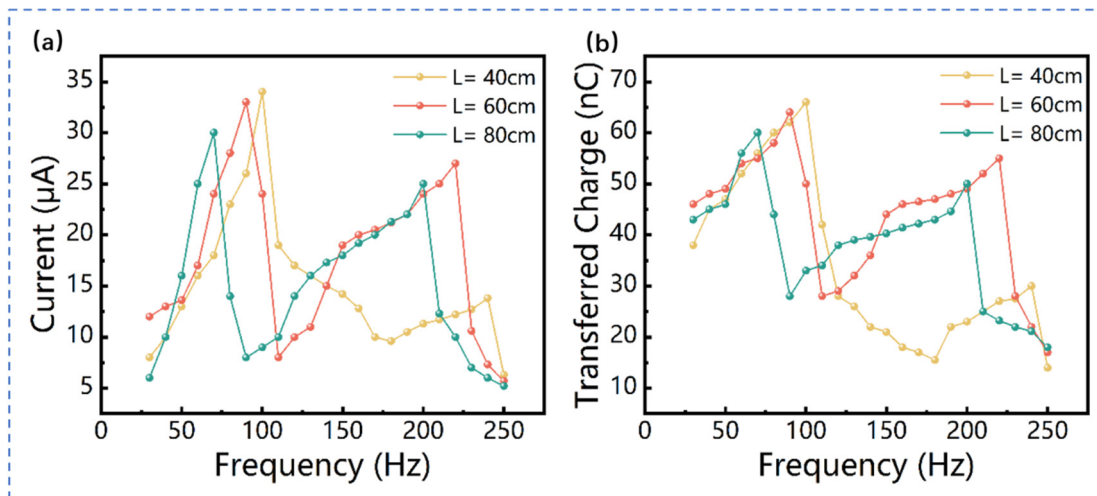

Figure S3. Effects of the quarter-wavelength resonant tube length on (a) the short-circuit current and (b) transferred charge of QWR-TENG.

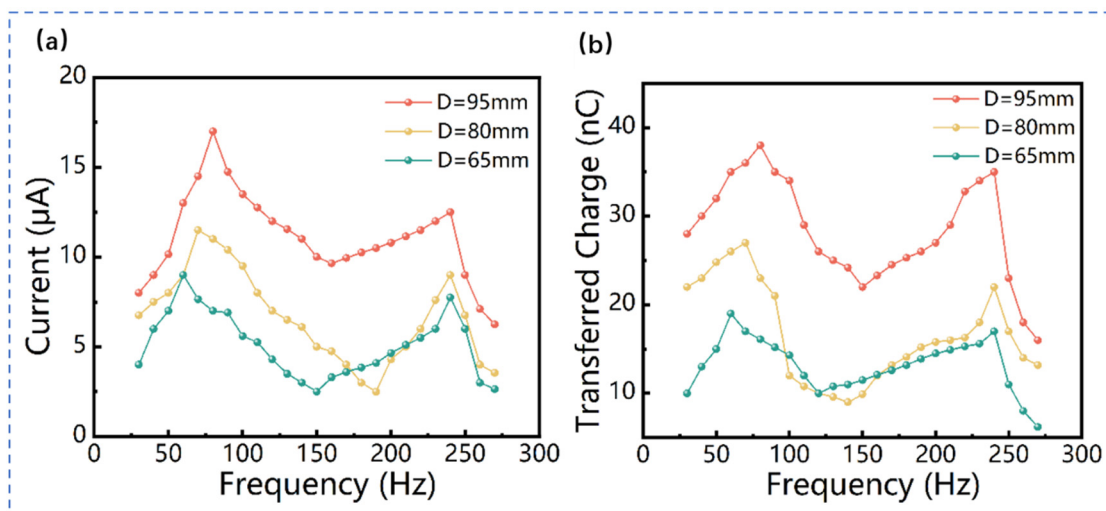

Figure S4. Effects of the quarter-wavelength resonant tube diameter on (a) the short-circuit current and (b) transferred charge of QWR-TENG.

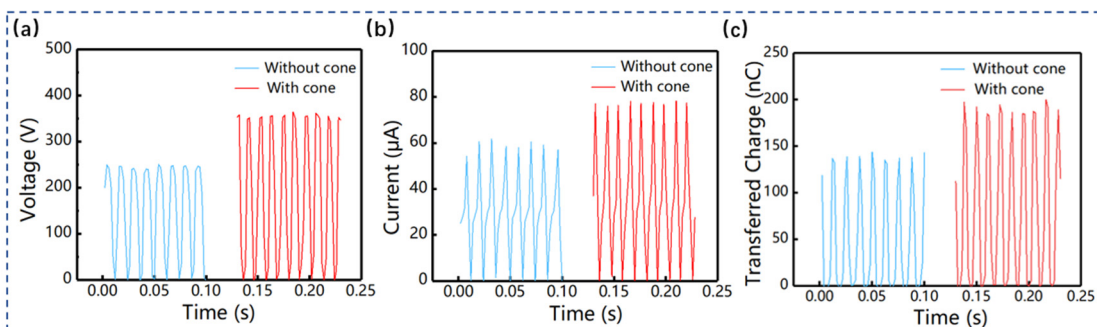

Figure S5. Comparison diagram of the output performances of QWR-TENG and CQWR-TENG under the acoustic frequency of 100 Hz and sound pressure level of 95.8 dB. (a) Open-circuit voltage, (b) short circuit current and (c) transferred charge.

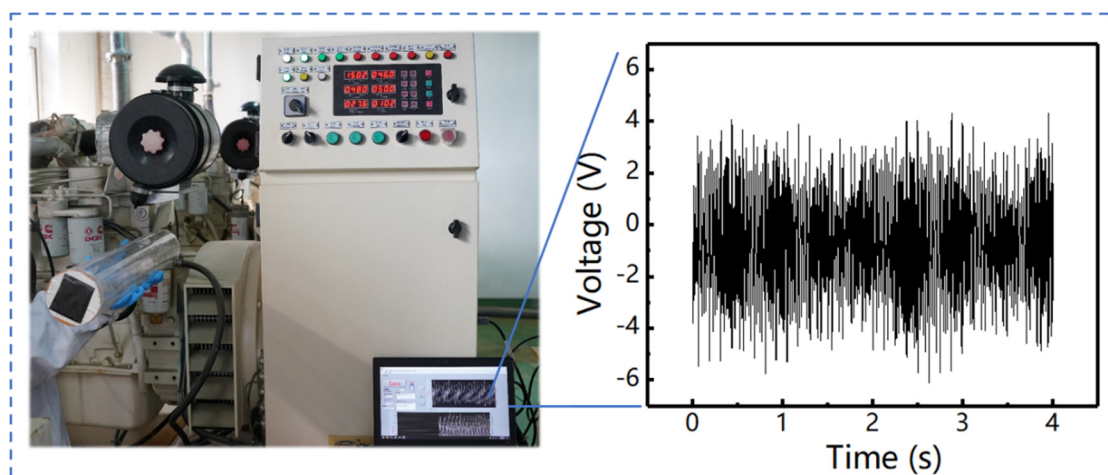

Figure S6. Demonstration experiment of QWR-TENG collecting low-frequency sound energy in an onshore machinery compartment.

**Table S1.** Acoustic energy harvesting capabilities of different acoustic harvesters

| Type            | SPL (dB) | Frequency (Hz) | Power ( $\mu$ W)   | Device dimensions (mm <sup>2</sup> ) | Power density per unit (WPa <sup>-1</sup> m <sup>-2</sup> ) | Ref. |
|-----------------|----------|----------------|--------------------|--------------------------------------|-------------------------------------------------------------|------|
| Electromagnetic | 125      | 143            | $2 \times 10^3$    | 589                                  | 0.094                                                       | [14] |
|                 | 100      | 319            | 789.65             | $2.826 \times 10^3$                  | 0.14                                                        | [48] |
| Piezoelectric   | 100      | 175            | 7.3                | $5 \times 10^3$                      | $0.7 \times 10^{-3}$                                        | [39] |
|                 | 100      | 2257.5         | 8.8                | $3.6 \times 10^3$                    | $1.22 \times 10^{-3}$                                       | [17] |
|                 | 100      | 100            | 0.3                | 100                                  | $1.5 \times 10^{-3}$                                        | [45] |
| TENG            | 110      | 199            | 650                | 800                                  | 0.13                                                        | [47] |
|                 | 106      | 100            | 670                | $4.9 \times 10^3$                    | 0.02                                                        | [8]  |
|                 | 110      | 240            | 796                | $1.327 \times 10^4$                  | 0.03                                                        | [33] |
|                 | 100      | /              | $4.33 \times 10^3$ | $5.02 \times 10^3$                   | 0.43                                                        | [38] |
|                 | 115      | 170            | $2.26 \times 10^4$ | $3.8 \times 10^3$                    | 0.93                                                        | [46] |
| Present         | 89.1     | 80             | $2.1 \times 10^3$  | $2.03 \times 10^3$                   | 1.82                                                        | [32] |
|                 | 100      | 100            | $1.35 \times 10^4$ | $3.03 \times 10^3$                   | 2.27                                                        |      |

## Supporting Videos

The videos of QWR-TENG powering 196 LEDs and the humidity and temperature sensor can be found in Video S1 and Video S2.
